# Supplementary material for: Assessment of Diet Quality in Chilean Urban Population through the Alternate Healthy Eating Index 2010: A Cross-Sectional Study
Source: PubMed Central journal article supplement (PMC6521181; doi:10.3390/nu11040891), 2019-04-20
Supplement: nutrients-11-00891-s001.pdf [file nutrients-11-00891-s001.pdf]

Article

# Assessment of Diet Quality in Chilean Urban Population through the Alternate Healthy Eating Index 2010: A Cross-Sectional Study

Victoria Pinto <sup>1</sup>, Leslie Landaeta-Díaz <sup>2</sup>, Oscar Castillo <sup>3</sup>, Luis Villarroel <sup>4</sup>, Attilio Rigotti <sup>1,5</sup>, Guadalupe Echeverría <sup>1,5,\*</sup> and ELANS Study Group

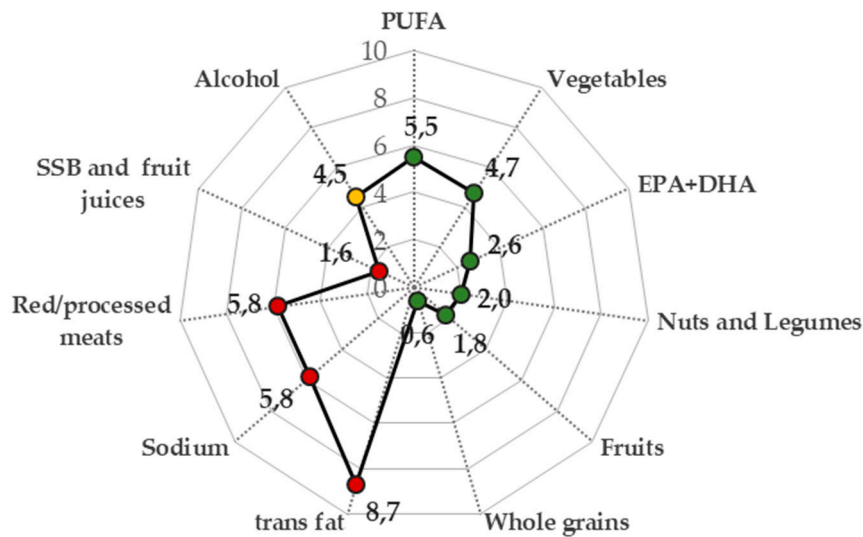

**Supplemental Figure S1.** Graphical description of Alternate Healthy Eating Index 2010 components. Components are ordered from highest to lowest mean AHEI-2010 scores separated by those with direct (green dots), indirect (red dots) and nonlinear (yellow dot) relation with the intake. SSB, sugar-sweetened beverages.
